# Supplementary material
Source: PubMed Central journal article supplement (PMC6981076)
Supplement: NIHMS1542577-supplement-Supplemental_Tables_1-2.pdf [file NIHMS1542577-supplement-Supplemental_Tables_1-2.pdf]

**Table S1. Genotypes used in this study, related to STAR Methods.**

| <b>Figure</b>                      | <b>Male genotype</b>                                                                                                                                                                                                                                                         |
|------------------------------------|------------------------------------------------------------------------------------------------------------------------------------------------------------------------------------------------------------------------------------------------------------------------------|
| Figure 1A, B                       | <i>w-</i> , <i>10xUAS-IVS-Syn21-Chrimson::tdT3.1-SV40 (attp18)</i> , <i>13xLexAop2—Syn21-OpGCaMP6s-p10 (su(Hw)attp8)</i> ; <i>15A01-AD (attp40)/+</i> ; <i>71G01-DBD (attp2)/Fru-LexA</i>                                                                                    |
| Figure 1C1-3                       | <i>w-</i> , <i>13xLexAop2-IVS-Syn21-mPA-p10 (su(Hw)attp8)</i> ; <i>15A01-AD (attp40)/13xLexAop2-IVS-Syn21-NLS-OpGCaMP6s-scalloped-NLS-p10 (su(Hw)attp5)</i> ; <i>71G01-DBD (attp2)</i> , <i>10xUAS-IVS-Syn21-Chrimson::tdT3.1-SV40 (su(Hw)attp1)/Fru-LexA</i>                |
| Figure 1C4                         | <i>w-</i> , <i>13xLexAop2-IVS-Syn21-mPA-p10 (su(Hw)attp8)</i> ; <i>15A01-AD (attp40)/13xLexAop2-IVS-Syn21-NLS-OpGCaMP6s-scalloped-NLS-p10 (su(Hw)attp5)</i> ; <i>71G01-DBD (attp2)</i> , <i>10xUAS-IVS-Syn21-Chrimson::tdT3.1-SV40 (su(Hw)attp1)/41A01-LexA::p65 (attp2)</i> |
| Figure 1D                          | <i>w-</i> ; <i>+/+</i> ; <i>41A01-Gal4 (attp2)/10xUAS-IVS-myr::GFP (attp2)</i>                                                                                                                                                                                               |
| Figure 1E                          | <i>w-</i> , <i>10xUAS-IVS-Syn21-Chrimson::tdT3.1-SV40 (attp18)</i> , <i>13xLexAop2—Syn21-OpGCaMP6s-p10 (su(Hw)attp8)</i> ; <i>15A01-AD (attp40)/+</i> ; <i>71G01-DBD (attp2)/41A01-LexA::p65 (attp40, attp2, or VK00027)</i>                                                 |
| Figure 2B, F                       | <i>w-</i> ; <i>15A01-AD (attp40)/BDP-LexA::p65 (attp40)</i> ; <i>71G01-DBD (attp2)</i> , <i>10xUAS-IVS-Syn21-Chrimson::tdT3.1-SV40 (su(Hw)attp1)/13xLexAop2-IVS-Kir2.1::eGFP (VK00027)</i>                                                                                   |
| Figure 2C, G                       | <i>w-</i> ; <i>15A01-AD (attp40)/41A01-LexA::p65 (attp40)</i> ; <i>71G01-DBD (attp2)</i> , <i>10xUAS-IVS-Syn21-Chrimson::tdT3.1-SV40 (su(Hw)attp1)/13xLexAop2-IVS-Kir2.1::eGFP (VK00027)</i>                                                                                 |
| Figure 3B, E, H, K<br>BDP>Chrimson | <i>w-</i> ; <i>BDP-AD (attp40)/20xUAS-IVS-Syn21-Chrimson::tdT3.1-SV40 (su(Hw)attp5)</i> ; <i>BDP-DBD (attp2)/+</i>                                                                                                                                                           |
| Figure 3B, E, H, K<br>P1>Chrimson  | <i>w-</i> ; <i>15A01-AD (attp40)/20xUAS-IVS-Syn21-Chrimson::tdT3.1-SV40 (su(Hw)attp5)</i> ; <i>15A01-DBD (attp2)/+</i>                                                                                                                                                       |
| Figure 3B, E, H, K<br>pCd>Chrimson | <i>w-</i> ; <i>41A01-AD (attp40)/20xUAS-IVS-Syn21-Chrimson::tdT3.1-SV40 (su(Hw)attp5)</i> ; <i>21D06-DBD (attp2)/+</i>                                                                                                                                                       |
| Figure 4A-D<br>pCd > GFP           | <i>w-</i> ; <i>41A01-AD (attp4)/+</i> ; <i>21D06-DBD (attp2)/10xUAS-IVS-syn21-GFP-p10 (attp2)</i>                                                                                                                                                                            |
| Figure 4A-D<br>pCd > Kir2.1        | <i>w-</i> ; <i>41A01-AD (attp4)/+</i> ; <i>21D06-DBD (attp2)/10xUAS-IVS-Kir2.1::eGFP (attp2)</i>                                                                                                                                                                             |
| Figure 4A-D<br>BDP > GFP           | <i>w-</i> ; <i>BDP-AD (attp4)/+</i> ; <i>BDP-DBD (attp2)/10xUAS-IVS-syn21-GFP-p10 (attp2)</i>                                                                                                                                                                                |
| Figure 4A-D<br>BDP > Kir2.1        | <i>w-</i> ; <i>BDP-AD (attp4)/+</i> ; <i>BDP-DBD (attp2)/10xUAS-IVS-Kir2.1::eGFP (attp2)</i>                                                                                                                                                                                 |

|                              |                                                                                                                                                                                                                                   |
|------------------------------|-----------------------------------------------------------------------------------------------------------------------------------------------------------------------------------------------------------------------------------|
| Figure 5A                    | <i>w-</i> ; <i>20xUAS-Syn21-OpGCaMP6s-p10 (su(Hw)attp5)/41A01-AD (attp40)</i> ;<br><i>10xUAS-IVS-Syn21-Chrimson::tdT3.1-SV40 (su(Hw)attp1)/21D06-DBD (attp2)</i>                                                                  |
| Figure 5C, G1,<br>G2, G4, G5 | <i>w-</i> , <i>10xUAS-IVS-Syn21-Chrimson::tdT3.1-SV40 (attp18)</i> , <i>13xLexAop2—Syn21-OpGCaMP6s-p10 (su(Hw)attp8)</i> ; <i>15A01-AD (attp40)/13xLexAop2-IVS-GtACR1::eYFP-SV40 (attp40)</i> ; <i>71G01-DBD (attp2)/Fru-LexA</i> |
| Figure 5D, G3,<br>G6         | Same as Fig. 1A                                                                                                                                                                                                                   |
| Figure 6B                    | Canton S (+/+ ; +/+ ; +/+)                                                                                                                                                                                                        |
| Figure 6D<br>BDP>GtACR1      | <i>w-</i> ; <i>BDP-AD (attp40)/+</i> ; <i>BDP-DBD (attp2)/ 20xUAS-IVS- GtACR1::eYFP-SV40 (attp2)</i>                                                                                                                              |
| Figure 6D<br>pCd>GtACR1      | <i>w-</i> ; <i>41A01-AD (attp40)/+</i> ; <i>21D06-DBD (attp2)/ 20xUAS-IVS- GtACR1::eYFP-SV40 (attp2)</i>                                                                                                                          |
| Figure 6D<br>P1>GtACR1       | <i>w-</i> ; <i>15A01-AD (attp40)/+</i> ; <i>71G01-DBD (attp2)/ 20xUAS-IVS- GtACR1::eYFP-SV40 (attp2)</i>                                                                                                                          |
| Figure 7C                    | <i>w-</i> , <i>10xUAS-IVS-Syn21-Chrimson::tdT3.1-SV40 (attp18)</i> , <i>13xLexAop2—Syn21-OpGCaMP6s-p10 (su(Hw)attp8)</i> ; <i>15A01-AD (attp40)/+</i> ; <i>71G01-DBD (attp2)/41A01-LexA::p65 (attp2, or VK00027)</i>              |
| Figure S1                    | Same as Fig. 1A                                                                                                                                                                                                                   |
| Figure S2B left              | Same as Fig. 1D                                                                                                                                                                                                                   |
| Figure S2B right             | <i>w-</i> ; +/+ ; <i>21D06-Gal4 (attp2)/10xUAS-IVS-myr::GFP (attp2)</i>                                                                                                                                                           |
| Figure S2C left              | Same as Fig. 1E                                                                                                                                                                                                                   |
| Figure S2C right             | <i>w-</i> , <i>10xUAS-IVS-Syn21-Chrimson::tdT3.1-SV40 (attp18)</i> , <i>13xLexAop2—Syn21-OpGCaMP6s-p10 (su(Hw)attp8)</i> ; <i>15A01-AD (attp40)/+</i> ; <i>71G01-DBD (attp2)/21D06-LexA::p65 (attp2)</i>                          |
| Figure S2D                   | <i>w-</i> ; <i>41A01-AD (attp40)/+</i> ; <i>21D06-DBD (attp2)/10xUAS-IVS-myr::GFP (attp2)</i>                                                                                                                                     |
| Figure S2E left              | <i>w-</i> ; <i>10xUAS-IVS-NLS-tdTomato (VK00022)/+</i> ; <i>41A01-LexA::p65 (VK00027)</i> , <i>13xLexAop2-IVS-NLS-GFP (VK00040)/41A01-Gal4 (attp2)</i>                                                                            |
| Figure S2E<br>middle         | <i>w-</i> ; <i>10xUAS-IVS-NLS-tdTomato (VK00022)/+</i> ; <i>41A01-LexA::p65 (VK00027)</i> , <i>13xLexAop2-IVS-NLS-GFP (VK00040)/21D06-Gal4 (attp2)</i>                                                                            |
| Figure S2E right             | <i>w-</i> ; <i>10xUAS-IVS-NLS-tdTomato (VK00022)/41A01-AD (attp40)</i> ; <i>41A01-LexA::p65 (VK00027)</i> , <i>13xLexAop2-IVS-NLS-GFP (VK00040)/21D06-DBD (attp2)</i>                                                             |
| Figure S2F                   | <i>w-</i> , <i>10xUAS-IVS-myr::GFP (su(Hw)attp8)</i> ; <i>41A01-AD (attp40)/+</i> ; <i>Chat-DBD/+</i>                                                                                                                             |
| Figure S2G                   | <i>w-</i> , <i>10xUAS-IVS-myr::GFP (su(Hw)attp8)</i> ; <i>Gad1-AD/+</i> ; <i>41A01-DBD (attp2)/+</i>                                                                                                                              |
| Figure S2H                   | <i>w-</i> , <i>10xUAS-IVS-myr::GFP (su(Hw)attp8)</i> ; <i>41A01-AD (attp40)/+</i> ; <i>VGlut-DBD/+</i>                                                                                                                            |
| Figure S2I                   | <i>w-</i> , <i>10xUAS-IVS-myr::GFP (su(Hw)attp8)</i> ; <i>41A01-AD (attp40)/+</i> ; <i>Dsx-DBD/+</i>                                                                                                                              |
| Figure S3                    | Same as Fig. 1E                                                                                                                                                                                                                   |

|               |                                                                                                                                                                                                                                                        |
|---------------|--------------------------------------------------------------------------------------------------------------------------------------------------------------------------------------------------------------------------------------------------------|
| Figure S4A-C  | <i>w-</i> ; <i>15A01-AD (attp40)/+</i> ; <i>71G01-DBD (attp2)/UAS-Denmark, UAS-Syt-eGFP</i>                                                                                                                                                            |
| Figure S4D-F  | <i>w-</i> ; <i>41A01-AD (attp40)/+</i> ; <i>21D06-DBD (attp2)/UAS-Denmark, UAS-Syt-eGFP</i>                                                                                                                                                            |
| Figure S4J-I  | <i>w-</i> , <i>13xLexAop2-IVS-myr::tdTomato (attp18)</i> ; <i>41A01-LexA (attp40)/LexAop-CD4::spGFP11</i> ; <i>71G01-Gal4 (attp2)/UAS-CD4::spGFP1-10</i>                                                                                               |
| Figure S4M-O  | <i>w-</i> , <i>13xLexAop2-IVS-myr::tdTomato (attp18)</i> ; <i>41A01-LexA (attp40)/LexAop-CD4::spGFP11</i> ; <i>15A01-Gal4 (attp2)/UAS-CD4::spGFP1-10</i>                                                                                               |
| Figure S4P-R  | <i>w-</i> , <i>13xLexAop2-IVS-myr::tdTomato (attp18)</i> ; <i>GH146-Gal4/LexAop-CD4::spGFP11</i> ; <i>Or83b-LexA/UAS-CD4::spGFP1-10</i>                                                                                                                |
| Figure S5A    | <i>w-</i> ; <i>BDP-AD (attp40)/13xLexAop2-IVS-CsChrimson::mVenus (attp40)</i> ; <i>BDP-DBD (attp2)/15A01-LexA::p65 (attp2), UAS-Kir2.1::eGFP</i>                                                                                                       |
| Figure S5B    | <i>w-</i> ; <i>41A01-AD (attp40)/13xLexAop2-IVS-CsChrimson::mVenus (attp40)</i> ; <i>21D06-DBD (attp2)/15A01-LexA::p65 (attp2), UAS-Kir2.1::eGFP</i>                                                                                                   |
| Figure S6A, B | Same as Fig. 5C                                                                                                                                                                                                                                        |
| Figure S6C-E  | <i>w-</i> , <i>10xUAS-IVS-Syn21-Chrimson::tdT3.1-SV40 (attp18)</i> , <i>13xLexAop2—Syn21-OpGCaMP6s-p10 (su(Hw)attp8)</i> ; <i>15A01-AD (attp40)/13xLexAop2-IVS-GtACR1::eYFP-SV40 (attp40)</i> ; <i>71G01-DBD (attp2)/41A01-LexA (attp2 or VK00027)</i> |
| Figure S7     | Same as Fig. 6D                                                                                                                                                                                                                                        |

Insertion sites: *attp18* (X), *su(Hw)attp8* (X), *su(Hw)attp5* (2R), *VK00022* (2R), *attp40* (2L), *VK00040* (3R), *VK00027* (3R), *su(Hw)attp1* (3R), *attp2* (3L).

Females: always wild-type Canton S (+/+ ; +/+ ; +/+)

**Table S2. Statistics, related to STAR Methods.**

| Figure                             | Statistical test                         | Comparisons              | Identifiers  | p-values                  |
|------------------------------------|------------------------------------------|--------------------------|--------------|---------------------------|
| Figure 1C2                         | Mann-Whitney U-test                      | NLS vs Cyto.<br>GCaMP    | n.s          | 0.15                      |
| Figure 2D left                     | Mann-Whitney U-test                      | BDP vs pCd               | ****         | 9.5e-13                   |
| Figure 2D right                    | Mann-Whitney U-test                      | BDP vs pCd               | n.s          | 0.82                      |
| Figure 2H left                     | Mann-Whitney U-test                      | BDP vs pCd               | ****         | 3.6e-16                   |
| Figure 2H right                    | Mann-Whitney U-test                      | BDP vs pCd               | n.s          | 0.11                      |
| Figure 3C during photo-stimulation | Kruskal-Wallis test<br>Dunn's correction | BDP vs pCd<br>BDP vs P1  | n.a<br>****  | not applicable<br>2.5e-13 |
| Figure 3C after photo-stimulation  | Kruskal-Wallis test<br>Dunn's correction | BDP vs pCd<br>BDP vs P1  | n.a<br>****  | not applicable<br>4.4e-13 |
| Figure 3F during photo-stimulation | Kruskal-Wallis test<br>Dunn's correction | BDP vs pCd<br>BDP vs P1  | ****<br>**** | 6.6e-06<br>1.5e-07        |
| Figure 3F after photo-stimulation  | Kruskal-Wallis test<br>Dunn's correction | BDP vs pCd<br>BDP vs P1  | ****<br>**** | 2.5e-06<br>6.4e-09        |
| Figure 3I after photo-stimulation  | Kruskal-Wallis test<br>Dunn's correction | BDP vs pCd<br>BDP vs P1  | n.s<br>****  | 0.58<br>1.3e-11           |
| Figure 3L after photo-stimulation  | Kruskal-Wallis test<br>Dunn's correction | BDP vs pCd<br>BDP vs P1  | ****<br>**** | 3.0e-08<br>7.9e-08        |
| Figure 4B pCd                      | Mann-Whitney U-test                      | pCd>GFP vs<br>pCd>Kir2.1 | ****         | 9.9e-07                   |
| Figure 4B BDP                      | Mann-Whitney U-test                      | BDP>GFP vs<br>BDP>Kir2.1 | n.s          | 0.4036                    |
| Figure 4C left total               | Mann-Whitney U-test                      | pCd>GFP vs<br>pCd>Kir2.1 | **           | 0.0017                    |
| Figure 4C left first 20%           | Mann-Whitney U-test                      | pCd>GFP vs<br>pCd>Kir2.1 | n.s          | 0.46                      |
| Figure 4C left last 20%            | Mann-Whitney U-test                      | pCd>GFP vs<br>pCd>Kir2.1 | ****         | 6.7e-06                   |
| Figure 4C right total              | Mann-Whitney U-test                      | BDP>GFP vs<br>BDP>Kir2.1 | n.s          | 0.38                      |

|                                        |                                          |                                    |      |          |
|----------------------------------------|------------------------------------------|------------------------------------|------|----------|
| Figure 4C right first 20%              | Mann-Whitney U-test                      | BDP>GFP vs<br>BDP>Kir2.1           | n.s  | 0.18     |
| Figure 4C right last 20%               | Mann-Whitney U-test                      | BDP>GFP vs<br>BDP>Kir2.1           | n.s  | 0.30     |
| Figure 4D left total                   | Mann-Whitney U-test                      | pCd>GFP vs<br>pCd>Kir2.1           | **** | 6.4e-09  |
| Figure 4D left first 20%               | Mann-Whitney U-test                      | pCd>GFP vs<br>pCd>Kir2.1           | n.s  | 0.26     |
| Figure 4D left last 20%                | Mann-Whitney U-test                      | pCd>GFP vs<br>pCd>Kir2.1           | **** | 3.6e-07  |
| Figure 4D right total                  | Mann-Whitney U-test                      | BDP>GFP vs<br>BDP>Kir2.1           | n.s  | 0.56     |
| Figure 4D right first 20%              | Mann-Whitney U-test                      | BDP>GFP vs<br>BDP>Kir2.1           | n.s  | 0.74     |
| Figure 4D right last 20%               | Mann-Whitney U-test                      | BDP>GFP vs<br>BDP>Kir2.1           | n.s  | 0.79     |
| Figure 5H pCd                          | Mann-Whitney U-test                      | Light on vs<br>Light off           | **** | 6.1e-06  |
| Figure 5H PPF2                         | Mann-Whitney U-test                      | Light on vs<br>Light off           | n.s  | 0.87     |
| Figure 6D<br>within genotype           | Wilcoxon signed-rank test                | BDP>GtACR1                         | n.s  | 0.80     |
|                                        |                                          | pCd>GtACR1                         | **** | 6.79e-06 |
|                                        |                                          | P1>GtACR1                          | n.s  | 0.49     |
| Figure 6D<br>between genotype          | Kruskal-Wallis test<br>Dunn's correction | BDP vs pCd                         | **   | 0.0070   |
|                                        |                                          | BDP vs P1                          | n.s  | 1        |
| Figure 6D                              | Wilcoxon signed-rank test                | cVA only vs<br>P1+cVA              | **   | 0.0020   |
| Figure S1H                             | Mann-Whitney U-test                      | P1 vs PPF1                         | **** | 6.2e-18  |
| Figure S3B                             | Wilcoxon signed-rank test                | 1 <sup>st</sup> vs 2 <sup>nd</sup> | *    | 0.011    |
|                                        | Dunn's correction                        | 2 <sup>nd</sup> vs 3 <sup>rd</sup> | n.s  | 0.15     |
| Figure S3D                             | Wilcoxon signed-rank test                | 1 <sup>st</sup> vs 2 <sup>nd</sup> | *    | 0.011    |
|                                        | Dunn's correction                        | 2 <sup>nd</sup> vs 3 <sup>rd</sup> | n.s  | 0.65     |
| Figure S3F                             | Wilcoxon signed-rank test                | 1 <sup>st</sup> vs 2 <sup>nd</sup> | n.s  | 1        |
|                                        | Dunn's correction                        | 2 <sup>nd</sup> vs 3 <sup>rd</sup> | n.s  | 0.65     |
| Figure S5C during<br>photo-stimulation | Mann-Whitney U-test                      | BDP vs pCd                         | n.s  | 0.56     |

|                                     |                     |                          |      |         |
|-------------------------------------|---------------------|--------------------------|------|---------|
| Figure S5C after photo-stimulation  | Mann-Whitney U-test | BDP vs pCd               | **** | 2.4e-06 |
| Figure S5D during photo-stimulation | Mann-Whitney U-test | BDP vs pCd               | n.s  | 0.37    |
| Figure S5D after photo-stimulation  | Mann-Whitney U-test | BDP vs pCd               | **** | 2.8e-09 |
| Figure S8C                          | Mann-Whitney U-test | Light on vs<br>Light off | **   | 0.0091  |
